# Supplementary material for: Regulation of the prometastatic neuregulin–MMP13 axis by SRC family kinases: therapeutic implications
Source: PubMed Central journal article supplement (PMC5709617; doi:10.1002/1878-0261.12145), 2017-10-31
Supplement: MOL2-11-1788-s001.pdf [file MOL2-11-1788-s001.pdf]

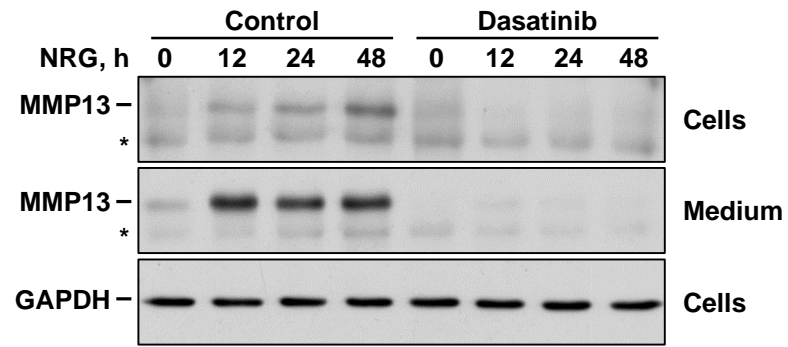

**Supplementary Figure S1**
